# Supplementary material for: In the Beginning Was the Bud: Phytochemicals from Olive (Olea europaea L.) Vegetative Buds and Their Biological Properties
Source: MDPI journal article supplement (doi:10.3390/metabo13020237), 2023-02-05
Supplement: s1 [file s1]

# In the Beginning was the Bud: Phytochemicals from Olive (*Olea europaea* L.) Vegetative Buds and Their Biological Properties

Marijana Popović <sup>1,\*</sup>, Franko Burčul <sup>2</sup>, Maja Veršić Bratinčević <sup>1</sup>, Nikolina Režić Mužinić <sup>3</sup>, Danijela Skroza <sup>4</sup>, Roberta Frleta Matas <sup>5</sup>, Marija Nazlić <sup>6</sup>, Tonka Ninčević Runjić <sup>7</sup>, Maja Jukić Špika <sup>1,8</sup>, Ana Bego <sup>1</sup>, Valerija Dunkić <sup>6</sup> and Elda Vitanović <sup>1</sup>

Table S1: Composition of volatiles identified in essential oils of olive vegetative buds from cvs. *Lastovka* and *Oblica*

| RI   | Lit. RI | Compound                | <i>Lastovka</i> (%) |      | <i>Oblica</i> (%) |      |
|------|---------|-------------------------|---------------------|------|-------------------|------|
|      |         |                         | mean                | SD   | mean              | SD   |
| 867  | 865     | (Z)-3-Hexen-1-ol*       | 0.67                | 0.14 | 1.03              | 0.14 |
| 874  | 875     | (Z)-2-Hexen-1-ol        | 0.04                | 0.00 | 0.02              | 0.00 |
| 875  | 876     | 1-Hexanol               | 0.11                | 0.07 | 0.20              | 0.01 |
| 901  | 901     | Heptanal                | 0.24                | 0.01 | 0.37              | 0.08 |
| 904  | 906     | Methional               | 0.01                | 0.00 | 0.13              | 0.00 |
| 908  | 910     | 2,4-Hexadienal*         | 0.04                | 0.01 | 0.04              | 0.00 |
| 931  | 934     | 2,7-Dimethyl-oxepine    | 0.02                | 0.00 | 0.02              | 0.00 |
| 952  | 954     | (E)-2-Heptenal          | 0.18                | 0.13 | 0.26              | 0.04 |
| 956  | 961     | Benzaldehyde            | 0.39                | 0.03 | 0.49              | 0.04 |
| 986  | 987     | 6-Methyl-5-hepten-2-one | 0.06                | 0.00 | 0.09              | 0.01 |
| 991  | 992     | 2-Pentylfuran           | 0.37                | 0.01 | 0.65              | 0.13 |
| 996  | 998     | (E,Z)-2,4-Heptadienal   | 0.11                | 0.01 | 0.13              | 0.02 |
| 1002 | 1001    | Octanal                 | 0.29                | 0.01 | 0.33              | 0.08 |
| 1009 | 1008    | (E,E)-2,4-Heptadienal   | 0.20                | 0.02 | 0.22              | 0.03 |
| 1026 | 1025    | Limonene                | 0.02                | 0.00 | 0.03              | 0.00 |
| 1031 | 1033    | Benzyl alcohol          | 0.06                | 0.00 | 0.14              | 0.01 |
| 1040 | 1040    | Benzeneacetaldehyde     | 2.91                | 0.24 | 3.91              | 1.04 |
| 1047 | 1011    | 3-Carene*               | n.d.                | -    | 0.02              | 0.00 |
| 1056 | 1056    | (E)-2-Octenal           | 0.13                | 0.00 | 0.19              | 0.04 |
| 1067 | 1067    | (E)-2-Octen-1-ol        | 0.09                | 0.01 | 0.07              | 0.02 |
| 1070 | 1068    | 1-Octanol               | 0.35                | 0.03 | 0.47              | 0.06 |
| 1099 | 1098    | Linalool*               | 0.17                | 0.06 | 0.84              | 0.06 |
| 1104 | 1105    | Nonanal*                | 4.29                | 0.11 | 4.73              | 0.87 |
| 1111 | 1111    | Phenylethyl Alcohol*    | 0.29                | 0.02 | 1.30              | 0.05 |
| 1137 | 1138    | Methyl nicotinate       | 0.03                | 0.01 | 0.08              | 0.01 |
| 1143 | 1154    | 6-Methyl-1-octanol      | 0.27                | 0.02 | 0.50              | 0.07 |
| 1152 | 1151    | (E,Z)-2,6-Nonadienal    | 0.07                | 0.00 | 0.18              | 0.02 |
| 1158 | 1159    | (E)-2-Nonenal           | 0.25                | 0.01 | 0.39              | 0.06 |
| 1171 | 1171    | 1-Nonanol               | 0.29                | 0.03 | 0.84              | 0.19 |

|      |        |                               |       |      |      |      |
|------|--------|-------------------------------|-------|------|------|------|
| 1189 | 1188   | $\alpha$ -Terpineol           | 0.06  | 0.00 | 0.19 | 0.03 |
| 1191 | 1191   | Methyl salicylate*            | 0.11  | 0.02 | 0.04 | 0.01 |
| 1200 | 1200   | Dodecane                      | 0.23  | 0.03 | 0.24 | 0.04 |
| 1205 | 1206   | Decanal*                      | 0.36  | 0.02 | 0.58 | 0.30 |
| 1213 | 1214   | ( <i>E,E</i> )-2,4-Nonadienal | 0.03  | 0.00 | 0.02 | 0.01 |
| 1254 | 1254   | Geraniol                      | 0.40  | 0.02 | 1.10 | 0.18 |
| 1260 | 1260   | ( <i>E</i> )-2-Decenal        | 0.71  | 0.04 | 0.55 | 0.09 |
| 1275 | 1276   | Nonanoic acid                 | 0.11  | 0.06 | 0.37 | 0.05 |
| 1285 | 1285   | Dihydroedulan II              | 0.31  | 0.02 | 0.61 | 0.12 |
| 1289 | 1289   | Indole                        | 0.04  | 0.00 | 0.04 | 0.01 |
| 1291 | 1292   | Dihydroedulan IA              | 0.27  | 0.02 | 0.06 | 0.01 |
| 1292 | 1293   | ( <i>E,Z</i> )-2,4-Decadienal | 0.22  | 0.02 | 0.11 | 0.01 |
| 1294 | 1294   | 2-Undecanone                  | 0.01  | 0.00 | 0.06 | 0.00 |
| 1295 | 1298   | Theaspirane A                 | 0.28  | 0.02 | 0.54 | 0.10 |
| 1300 | 1300   | Tridecane                     | 0.05  | 0.01 | 0.11 | 0.01 |
| 1307 | 1307   | Undecanal                     | 0.09  | 0.01 | 0.15 | 0.03 |
| 1311 | 1312   | 2-Vinylguaicol                | 0.18  | 0.02 | 0.38 | 0.04 |
| 1313 | 1315   | Theaspirane B                 | 0.35  | 0.02 | 0.66 | 0.10 |
| 1314 | 1316   | ( <i>E,E</i> )-2,4-Decadienal | 0.71  | 0.06 | 0.53 | 0.05 |
| 1349 | -      | Methyl 5-vinylnicotinate      | 0.43  | 0.06 | 1.49 | 0.60 |
| 1355 | 1356   | Eugenol*                      | 0.60  | 0.04 | 0.32 | 0.02 |
| 1363 | 1363   | 2-Undecenal                   | 0.14  | 0.01 | 0.24 | 0.04 |
| 1369 | 1370   | n-Decanoic acid               | 0.02  | 0.01 | 0.10 | 0.05 |
| 1383 | 1384   | $\beta$ -Damascenone          | 0.04  | 0.00 | 0.10 | 0.01 |
| 1397 | 1397   | ( <i>Z</i> )-Jasmone          | 0.08  | 0.00 | 0.09 | 0.01 |
| 1400 | 1400   | Tetradecane                   | 0.85  | 0.07 | 0.88 | 0.14 |
| 1407 | 1405   | 1,3,5-Trimethoxybenzene*      | 12.60 | 0.97 | 2.12 | 0.30 |
| 1416 | 1416   | Caryophyllene*                | 0.14  | 0.03 | 0.12 | 0.02 |
| 1437 | 1436   | Dihydro- $\beta$ -ionone      | 0.01  | 0.00 | 0.04 | 0.01 |
| 1444 | 1449.2 | Dihydro- $\beta$ -ionol       | n.d.  | -    | 0.08 | 0.00 |
| 1452 | 1452   | ( <i>E</i> )-Geranyl acetone  | 0.32  | 0.02 | 0.29 | 0.06 |
| 1463 | 1465.1 | 2,6,10-Trimethyltridecane     | 0.54  | 0.07 | 0.81 | 0.07 |
| 1474 | 1473   | 1-Dodecanol                   | 0.03  | 0.01 | 0.12 | 0.01 |
| 1478 | 1478   | Germacrene D                  | 0.03  | 0.00 | n.d. | -    |
| 1484 | 1484   | ( <i>E</i> )- $\beta$ -Ionone | 0.29  | 0.02 | 0.43 | 0.04 |
| 1496 | 1496   | 2-Tridecanone                 | 0.15  | 0.01 | 0.33 | 0.05 |
| 1500 | 1500   | Pentadecane                   | 0.22  | 0.01 | 0.23 | 0.04 |
| 1508 | 1508   | $\alpha$ -Farnesene           | 0.18  | 0.00 | 0.21 | 0.03 |
| 1512 | 1512   | Butylated Hydroxytoluene      | 0.49  | 0.12 | 0.53 | 0.40 |
| 1563 | 1562   | Nerolidol                     | 0.20  | 0.04 | 0.37 | 0.11 |
| 1571 | 1571   | 3-Methyl-pentadecane          | 0.07  | 0.00 | 0.12 | 0.00 |
| 1600 | 1600   | Hexadecane                    | 0.59  | 0.02 | 0.65 | 0.07 |
| 1612 | 1612   | Tetradecanal                  | 0.24  | 0.00 | 0.31 | 0.03 |

|                                |      |                           |         |      |         |      |
|--------------------------------|------|---------------------------|---------|------|---------|------|
| 1651                           | 1656 | Neointermedeol            | n.d.    | -    | 0.55    | 0.39 |
| 1670                           | 1669 | (E,E)-6,8-Heptadecadiene  | 0.88    | 0.10 | 0.55    | 0.17 |
| 1677                           | 1692 | (Z)-3-Heptadecene         | 16.25   | 1.60 | 8.13    | 2.15 |
| 1700                           | 1700 | Heptadecane               | 2.57    | 0.21 | 1.37    | 0.35 |
| 1714                           | 1714 | Pentadecanal              | 0.48    | 0.02 | 0.50    | 0.04 |
| 1722                           | 1721 | Farnesol                  | n.d.    | -    | 0.06    | 0.01 |
| 1746                           | 1745 | 7-Methyl-heptadecane      | n.d.    | -    | 0.08    | 0.01 |
| 1772                           | 1771 | 3-Methyl-heptadecane      | 0.07    | 0.00 | 0.12    | 0.01 |
| 1793                           | 1793 | 1-Octadecene              | n.d.    | -    | 0.05    | 0.01 |
| 1800                           | 1800 | Octadecane                | 0.26    | 0.01 | 0.28    | 0.01 |
| 1803                           | 1805 | 2-Ethylhexyl salicylate   | 0.07    | 0.01 | n.d.    | -    |
| 1816                           | 1817 | Hexadecanal               | 0.07    | 0.00 | 0.17    | 0.03 |
| 1828                           | 1828 | Isopropyl myristate       | 0.02    | 0.01 | 0.03    | 0.01 |
| 1845                           | 1845 | Hexahydrofarnesyl acetone | 1.02    | 0.14 | 2.54    | 0.66 |
| 1874                           | 1875 | 1-Nonadecene              | 0.15    | 0.01 | 0.19    | 0.08 |
| 1880                           | 1904 | Homosalate                | 0.17    | 0.01 | 0.53    | 0.10 |
| 1888                           | -    | (Z)-5-Nonadecene          | 0.05    | 0.00 | 0.15    | 0.07 |
| 1900                           | 1900 | Nonadecane                | 1.50    | 0.06 | 1.46    | 0.44 |
| 1927                           | 1927 | Methyl palmitate          | 0.04    | 0.00 | 0.07    | 0.02 |
| 1965                           | 1965 | Hexadecanoic acid         | 1.06    | 0.15 | 2.53    | 0.55 |
| 1972                           | 1972 | 3-Methyl-nonadecane       | 0.09    | 0.01 | 0.30    | 0.06 |
| 2000                           | 2000 | Eicosane                  | 0.35    | 0.01 | 0.47    | 0.10 |
| 2005                           | 2006 | 5,5-Diethylheptadecane    | 0.01    | 0.00 | 0.09    | 0.00 |
| 2020                           | 2021 | Octadecanal               | 0.02    | 0.00 | 0.11    | 0.03 |
| 2027                           | 2032 | Isopropyl palmitate       | 0.04    | 0.01 | n.d.    | -    |
| 2085                           | 2087 | 1-Henicosene              | 2.85    | 0.07 | 1.68    | 0.55 |
| 2103                           | 2100 | Heneicosane               | 7.92    | 0.16 | 6.02    | 1.39 |
| 2114                           | 2114 | Phytol                    | 0.12    | 0.02 | 1.69    | 0.35 |
| 2200                           | 2200 | Docosane                  | 0.83    | 0.03 | 0.68    | 0.13 |
| 2274                           | 2274 | (Z)-9-Tricosene           | 2.53    | 0.32 | 2.39    | 0.61 |
| 2303                           | 2300 | Tricosane                 | 7.08    | 0.55 | 4.02    | 0.67 |
| 2400                           | 2400 | Tetracosane               | 0.44    | 0.04 | 0.40    | 0.06 |
| 2429                           | 2430 | Docosanal                 | 0.05    | 0.01 | 0.09    | 0.01 |
| 2502                           | 2500 | Pentacosane               | 2.04    | 0.18 | 1.51    | 0.27 |
| 2600                           | 2600 | Hexacosane                | 0.16    | 0.03 | 0.29    | 0.04 |
| 2693                           | 2700 | Heptacosane               | 2.05    | 0.25 | 4.10    | 0.29 |
| 2800                           | 2800 | Octacosane                | 0.31    | 0.03 | 0.76    | 0.06 |
| 2821                           | 2833 | Squalene                  | 0.54    | 0.08 | 0.28    | 0.03 |
| 2888                           | 2900 | Nonacosane                | 3.81    | 0.44 | 7.93    | 0.50 |
| 2999                           | 3000 | Triacontane               | 0.15    | 0.02 | 0.38    | 0.01 |
| 3103                           | 3100 | Hentriacontane            | 1.28    | 0.14 | 2.10    | 0.16 |
| Total chromatogram identified: |      |                           | 92.08 % |      | 88.59 % |      |
| Alcohols                       |      |                           | 1.69    |      | 3.23    |      |

|                                 |       |       |
|---------------------------------|-------|-------|
| <i>Aldehydes</i>                | 9.69  | 11.29 |
| <i>Ketones</i>                  | 1.99  | 3.97  |
| <i>Esters</i>                   | 0.23  | 0.21  |
| <i>Fatty acids</i>              | 1.19  | 3.00  |
| <i>Phenols</i>                  | 0.66  | 0.91  |
| <i>Anisole derivative</i>       | 12.60 | 2.12  |
| <i>Monoterpenes</i>             | 0.02  | 0.05  |
| <i>Sesquiterpenes</i>           | 0.35  | 0.33  |
| <i>Triterpenes</i>              | 0.54  | 0.28  |
| <i>Monoterpene alcohols</i>     | 0.63  | 2.13  |
| <i>Sesquiterpene alcohol</i>    | n.d.  | 0.06  |
| <i>Diterpene alcohols</i>       | 0.12  | 1.69  |
| <i>Furans</i>                   | 0.37  | 0.65  |
| <i>Heterocyclic compounds</i>   | 1.70  | 3.96  |
| <i>Saturated hydrocarbons</i>   | 33.48 | 35.36 |
| <i>Unsaturated hydrocarbons</i> | 22.71 | 13.14 |
| <i>Aromatic hydrocarbons</i>    | 4.11  | 6.19  |

Table S2: The MS spectra of corresponding TMS metabolites from olive vegetative bud extracts. MS spectra were obtained from the Golm Metabolome Database<sup>[G]</sup>, MassBank<sup>[M]</sup>, NIST Chemistry WebBook<sup>[N]</sup>, by derivatized analytical standard<sup>[S]</sup>, as well as by comparison with literature data<sup>[L]</sup>.

|    | RI   | Compound                                                          | Relative Intensity (m/z)                                                                           |
|----|------|-------------------------------------------------------------------|----------------------------------------------------------------------------------------------------|
| 1  | 1323 | Glyceric acid, 3TMS derivative <sup>[G, N]</sup>                  | 293 (13), 292 (40), 205 (14), 189 (49), 147 (61), 133 (17), 117 (11), 103 (22), 102 (18), 73 (100) |
| 2  | 1332 | (E)-2-Butenedioic acid, 2TMS derivative <sup>[N]</sup>            | 247 (9), 246 (17), 245 (100), 148 (6), 147 (39), 143 (14), 133 (6), 75 (17), 73 (46), 45 (10)      |
| 3  | 1499 | Malic acid, 3TMS derivative <sup>[G, N]</sup>                     | 245 (13), 233 (24), 190 (8), 189 (11), 147 (53), 133 (9), 75 (9), 74 (8), 73 (100), 45 (8)         |
| 4  | 1573 | Tyrosol, 2TMS derivative <sup>[N]</sup>                           | 283 (5), 282 (20), 267 (13), 193 (11), 180 (14), 179 (100), 103 (11), 75 (5), 73 (49), 45 (7)      |
| 5  | 1585 | Threonic acid, 4TMS derivative <sup>[G, N]</sup>                  | 293 (16), 292 (55), 220 (28), 217 (20), 205 (24), 148 (9), 147 (58), 117 (15), 103 (13), 73 (100)  |
| 6  | 1655 | Rhamnose, 4TMS derivative <sup>[N]</sup>                          | 217 (6), 206 (9), 205 (20), 204 (100), 191 (21), 189 (8), 147 (14), 130 (5), 74 (4), 73 (40)       |
| 7  | 1673 | Arabinopyranose, 4TMS derivative (isomer 2) <sup>[N]</sup>        | 218 (16), 217 (85), 205 (14), 204 (72), 191 (61), 147 (30), 107 (11), 75 (15), 73 (100), 45 (11)   |
| 8  | 1689 | Arabinose, 4TMS derivative <sup>[N]</sup>                         | 219 (8), 218 (19), 217 (100), 205 (13), 204 (71), 192 (11), 191 (63), 189 (8), 147 (27), 73 (94)   |
| 9  | 1755 | Xylitol, 5TMS derivative <sup>[G, N]</sup>                        | 319 (24), 307 (30), 218 (27), 217 (100), 205 (19), 189 (11), 147 (34), 129 (26), 103 (48), 73 (92) |
| 10 | 1780 | 2-(3,4-Dihydroxyphenyl) ethanol, TMS derivative <sup>[N]</sup>    | 371 (17), 370 (46), 269 (10), 268 (28), 267 (100), 193 (24), 179 (15), 75 (8), 73 (69), 45 (10)    |
| 11 | 1843 | Fructofuranose (isomer 2), 5TMS derivative <sup>[N]</sup>         | 438 (14), 437 (35), 257 (12), 219 (10), 218 (18), 217 (92), 147 (25), 129 (8), 74 (8), 73 (100)    |
| 12 | 1880 | Methyl- $\alpha$ -glucofuranoside, 4TMS derivative <sup>[N]</sup> | 219 (18), 218 (51), 217 (100), 204 (22), 191 (22), 147 (19), 132 (17), 129 (46), 103 (13), 73 (77) |
| 13 | 1899 | Quinic acid, 5TMS derivative <sup>[G, N]</sup>                    | 347 (16), 346 (28), 345 (100), 334 (9), 256 (9), 255 (38), 204 (10), 191 (10), 147 (26), 73 (69)   |
| 14 | 1922 | Gluconolactone, 4TMS derivative <sup>[N]</sup>                    | 319 (20), 229 (9), 220 (14), 217 (19), 205 (9), 204 (14), 147 (26), 129 (27), 103 (12), 73 (100)   |
| 15 | 1932 | Glucose, 5TMS derivative <sup>[N]</sup>                           | 218 (6), 217 (22), 206 (10), 205 (20), 204 (100), 192 (9), 191 (49), 147 (20), 129 (9), 73 (56)    |
| 16 | 1973 | Mannitol, 6TMS derivative <sup>[G, N]</sup>                       | 319 (34), 218 (44), 217 (52), 205 (62), 157 (34), 147 (41), 129 (15), 117 (19), 103 (27), 73 (100) |
| 17 | 1990 | Galactose, 5TMS derivative <sup>[N]</sup>                         | 218 (11), 217 (45), 205 (19), 204 (83), 191 (33), 147 (22), 129 (10), 75 (18), 74 (9), 73 (100)    |
| 18 | 2033 | Galactopyranose, 5TMS derivative (isomer 2) <sup>[N]</sup>        | 217 (30), 206 (12), 205 (30), 204 (100), 192 (16), 191 (78), 147 (33), 129 (12), 74 (10), 73 (94)  |
| 19 | 2045 | $\beta$ -Galactofuranose, 5TMS derivative <sup>[N]</sup>          | 305 (14), 219 (10), 218 (19), 217 (100), 204 (14), 191 (12), 147 (22), 129 (11), 75 (8), 73 (65)   |
| 20 | 2054 | Palmitic Acid, TMS derivative <sup>[N]</sup>                      | 314 (20), 313 (77), 145 (24), 132 (50), 129 (39), 117 (100), 75 (53), 73 (76), 55 (20), 43 (25)    |
| 21 | 2105 | Ferulic acid, 2TMS derivative <sup>[N, S]</sup>                   | 339 (24), 338 (100), 324 (19), 323 (62), 308 (51), 293 (34), 249 (39), 191 (20), 147 (30), 73(91)  |
| 22 | 2131 | Myo-Inositol, 6TMS derivative <sup>[N]</sup>                      | 318 (49), 306 (27), 305 (81), 265 (20), 218 (18), 217 (94), 204 (18), 191 (47), 147 (55), 73 (100) |

|    |      |                                                       |                                                                                                    |
|----|------|-------------------------------------------------------|----------------------------------------------------------------------------------------------------|
| 23 | 2154 | Caffeic acid, 3TMS derivative <sup>[G,N,S]</sup>      | 398 (13), 397 (28), 396 (80), 381 (19), 249 (9), 220 (17), 219 (100), 191 (15), 45 (12), 73 (61)   |
| 24 | 2216 | Linoleic acid, TMS derivative <sup>[M, N]</sup>       | 337 (52), 129 (36), 117 (36), 95 (43), 81 (67), 75 (91), 73 (100), 67 (74), 55 (49), 41 (38)       |
| 25 | 2222 | Oleic acid, TMS derivative <sup>[N]</sup>             | 339 (81), 145 (36), 129 (75), 117 (96), 96 (28), 75 (90), 73 (100), 55 (55), 43 (29), 41 (37)      |
| 26 | 2250 | Stearic acid, TMS derivative <sup>[M,N]</sup>         | 342 (21), 341 (76), 145 (30), 132 (50), 129 (42), 117 (100), 75 (51), 73 (75), 55 (21), 43 (30)    |
| 27 | 2417 | Oleamide, TMS derivative <sup>[N]</sup>               | 338 (38), 144 (62), 131 (100), 128 (43), 116 (53), 75 (71), 73 (87), 55 (29), 43 (22), 41 (26)     |
| 28 | 2428 | Uridine, 3TMS derivative <sup>[G, M, N]</sup>         | 259 (26), 219 (10), 218 (28), 217 (95), 169 (12), 147 (21), 129 (13), 103 (20), 75 (10), 73 (100)  |
| 29 | 2448 | Arachidic acid, TMS derivative <sup>[N]</sup>         | 369 (71), 145 (38), 132 (71), 131 (46), 129 (43), 117 (100), 75 (66), 73 (87), 55 (28), 43 (43)    |
| 30 | 2609 | 1-Monopalmitin, 2TMS derivative <sup>[N]</sup>        | 372 (28), 371 (100), 239 (17), 204 (19), 203 (18), 147 (31), 129 (21), 73 (61), 57 (21), 43 (21)   |
| 31 | 2714 | Sucrose, 8TMS derivative <sup>[G,N]</sup>             | 437 (19), 363 (15), 362 (31), 361 (100), 271 (13), 217 (35), 169 (11)                              |
| 32 | 2803 | Glycerol monostearate, 2TMS derivative <sup>[N]</sup> | 400 (29), 399 (100), 203 (17), 147 (24), 129 (17), 73 (33), 71 (12), 57 (20), 55 (12), 43 (20)     |
| 33 | 3055 | Methyloleoside, 5TMS derivative <sup>[N]</sup>        | 362 (33), 361 (100), 297 (21), 217 (29), 169 (20), 165 (69), 147 (26), 129 (19), 103 (18), 73 (97) |
| 34 | 3179 | Chlorogenic acid, 6TMS derivative <sup>[N,S]</sup>    | 397 (18), 347 (17), 346 (33), 345 (99), 324 (17), 307 (44), 256 (17), 255 (67), 147 (19), 73 (100) |
| 35 | 3236 | Quercetin, 5TMS derivative <sup>[N,S]</sup>           | 651 (4), 650 (12), 649 (33), 648 (57), 647 (100), 561 (3), 560 (5), 559 (9), 73 (21), 45 (2)       |
| 36 | 3312 | Luteolin, 4TMS derivative <sup>[N]</sup>              | 562 (8), 561 (27), 560 (51), 559 (100), 472 (4), 471 (10), 452 (3), 399 (6), 73 (21), 45 (3)       |
| 37 | 3360 | $\beta$ -Sitosterol, TMS derivative <sup>[G,N]</sup>  | 486 (44), 396 (84), 357 (70), 129 (100), 121 (34), 95 (40), 81 (34), 73 (56), 57 (40), 43 (51)     |
| 38 | 3569 | Erythrodiol, 2TMS derivative <sup>[N]</sup>           | 497 (36), 496 (75), 217 (27), 216 (100), 204 (37), 203 (53), 201 (21), 189 (28), 161 (26), 73 (50) |
| 39 | 3682 | Oleanolic acid, 2TMS derivative <sup>[G, N]</sup>     | 483 (14), 482 (25), 320 (34), 204 (16), 203 (100), 202 (63), 190 (25), 189 (31), 75 (14), 73 (44)  |
| 40 | 3702 | Betulinic acid, 2TMS derivative <sup>[N]</sup>        | 320 (29), 292 (26), 202 (27), 190 (44), 189 (71), 188 (26), 187 (27), 129 (27), 75 (35), 73 (100)  |
| 41 | 3750 | Ursolic acid, 2TMS derivative <sup>[N]</sup>          | 321 (20), 320 (74), 203 (100), 202 (39), 190 (20), 189 (27), 133 (45), 119 (21), 75 (18), 73 (43)  |
| 42 | 4002 | Maslinic acid, 3TMS derivative <sup>[L]</sup>         | 570 (22), 320 (43), 204 (20), 203 (100), 202 (69), 189 (29), 187 (20), 147 (30), 133 (20), 73 (83) |

Table S3: Significance level ( $p < 0.05$ ) of metabolically active human breast adenocarcinoma MDA-MB-231, human breast metastatic adenocarcinoma MCF7, and human ovarian carcinoma OVCAR-3 cell lines in comparison to non-treated cell line samples after 24, 48 and 72 h of incubation with different concentrations of olive vegetative bud essential oil (a) and extract (b) from cvs. *Lastovka* and *Oblica*

| a)            | MDA-MB-231 |       |       | MCF-7 |       |       | OVCAR-3 |       |       |
|---------------|------------|-------|-------|-------|-------|-------|---------|-------|-------|
| Lastovka      |            |       |       |       |       |       |         |       |       |
| conc. (µg/mL) | 24 h       | 48 h  | 72 h  | 24 h  | 48 h  | 72 h  | 24 h    | 48 h  | 72 h  |
| 1             | 0.095      | 0.157 | 0.099 | 0.282 | 0.049 | 1.000 | 0.649   | 0.515 | 0.338 |
| 5             | 0.114      | 0.126 | 0.052 | 0.183 | 0.019 | 0.013 | 0.681   | 0.572 | 0.480 |
| 10            | 0.147      | 0.084 | 0.074 | 0.308 | 0.010 | 0.024 | 0.705   | 0.525 | 0.708 |
| 50            | 0.087      | 0.088 | 0.071 | 0.168 | 0.006 | 0.043 | 0.889   | 0.627 | 0.742 |
| 100           | 0.098      | 0.170 | 0.053 | 0.107 | 0.050 | 0.004 | 0.996   | 0.755 | 0.457 |
| 200           | 0.087      | 0.092 | 0.041 | 0.092 | 0.001 | 0.008 | 0.779   | 0.882 | 0.491 |
| Oblica        |            |       |       |       |       |       |         |       |       |
| conc. (µg/mL) | 24 h       | 48 h  | 72 h  | 24 h  | 48 h  | 72 h  | 24 h    | 48 h  | 72 h  |
| 1             | -          | 0.085 | 0.081 | 0.132 | 0.024 | 0.070 | 0.903   | 0.604 | 0.383 |
| 5             | 0.075      | 0.052 | 0.039 | 0.061 | 0.002 | 0.043 | 0.623   | 0.979 | 0.399 |
| 10            | 0.128      | 0.156 | 0.064 | 0.044 | 0.018 | 0.010 | 0.611   | 0.840 | 0.248 |
| 50            | 0.136      | 0.111 | 0.121 | 0.039 | 0.014 | 0.017 | 0.733   | 0.569 | 0.263 |
| 100           | 0.136      | 0.201 | 0.578 | 0.669 | 0.039 | 0.009 | 0.811   | 0.414 | 0.124 |
| 200           | 0.155      | 0.132 | 0.112 | 0.137 | 0.003 | 0.012 | 0.357   | 0.408 | 0.124 |

| b)            | MDA-MB-231 |       |       | MCF-7 |       |       | OVCAR-3 |       |       |
|---------------|------------|-------|-------|-------|-------|-------|---------|-------|-------|
| Lastovka      |            |       |       |       |       |       |         |       |       |
| conc. (µg/mL) | 24 h       | 48 h  | 72 h  | 24 h  | 48 h  | 72 h  | 24 h    | 48 h  | 72 h  |
| 1             | 0.048      | 0.008 | 0.014 | 0.020 | 0.046 | 0.013 | 0.364   | 0.607 | 0.535 |
| 5             | 0.043      | 0.001 | 0.026 | 0.417 | 0.004 | 0.006 | 0.287   | 0.498 | 0.462 |
| 10            | 0.035      | 0.004 | 0.012 | 0.080 | 0.251 | 0.003 | 0.303   | 0.770 | 0.738 |
| 50            | 0.027      | 0.010 | 0.084 | 0.388 | 0.240 | 0.029 | 0.405   | 0.970 | 0.904 |
| 100           | 0.224      | 0.011 | 0.027 | 0.073 | 0.154 | 0.033 | 0.566   | 0.612 | 0.362 |
| 200           | 0.016      | 0.000 | 0.000 | 0.003 | 0.004 | 0.001 | 0.579   | 0.475 | 0.720 |
| Oblica        |            |       |       |       |       |       |         |       |       |
| conc. (µg/mL) | 24 h       | 48 h  | 72 h  | 24 h  | 48 h  | 72 h  | 24 h    | 48 h  | 72 h  |
| 1             | 0.049      | 0.048 | 0.013 | 0.004 | 0.072 | 0.492 | 0.957   | 0.881 | 0.943 |
| 5             | 0.121      | 0.005 | 0.003 | 0.483 | 0.137 | 0.142 | 0.934   | 0.882 | 0.646 |
| 10            | 0.153      | 0.008 | 0.004 | 0.827 | 0.018 | 0.011 | 0.762   | 0.702 | 0.561 |
| 50            | 0.252      | 0.003 | 0.023 | 0.299 | 0.061 | 0.111 | 0.562   | 0.579 | 0.485 |
| 100           | 0.055      | 0.001 | 0.000 | 0.135 | 0.002 | 0.003 | 0.421   | 0.417 | 0.304 |
| 200           | 0.010      | 0.000 | 0.000 | 0.006 | 0.003 | 0.002 | 0.473   | 0.696 | 0.235 |
