# Supplementary material for: In the Beginning Was the Bud: Phytochemicals from Olive (Olea europaea L.) Vegetative Buds and Their Biological Properties
Source: MDPI journal article supplement (doi:10.3390/metabo13020237), 2023-02-05
Supplement: s1 [file s1]

---

# In the Beginning was the Bud: Phytochemicals from Olive (*Olea europaea* L.) Vegetative Buds and Their Biological Properties

Marijana Popović <sup>1,\*</sup>, Franko Burčul <sup>2</sup>, Maja Veršić Bratinčević <sup>1</sup>, Nikolina Režić Mužinić <sup>3</sup>, Danijela Skroza <sup>4</sup>, Roberta Frleta Matas <sup>5</sup>, Marija Nazlić <sup>6</sup>, Tonka Ninčević Runjić <sup>7</sup>, Maja Jukić Špika <sup>1,8</sup>, Ana Bego <sup>1</sup>, Valerija Dunkić <sup>6</sup> and Elda Vitanović <sup>1</sup>



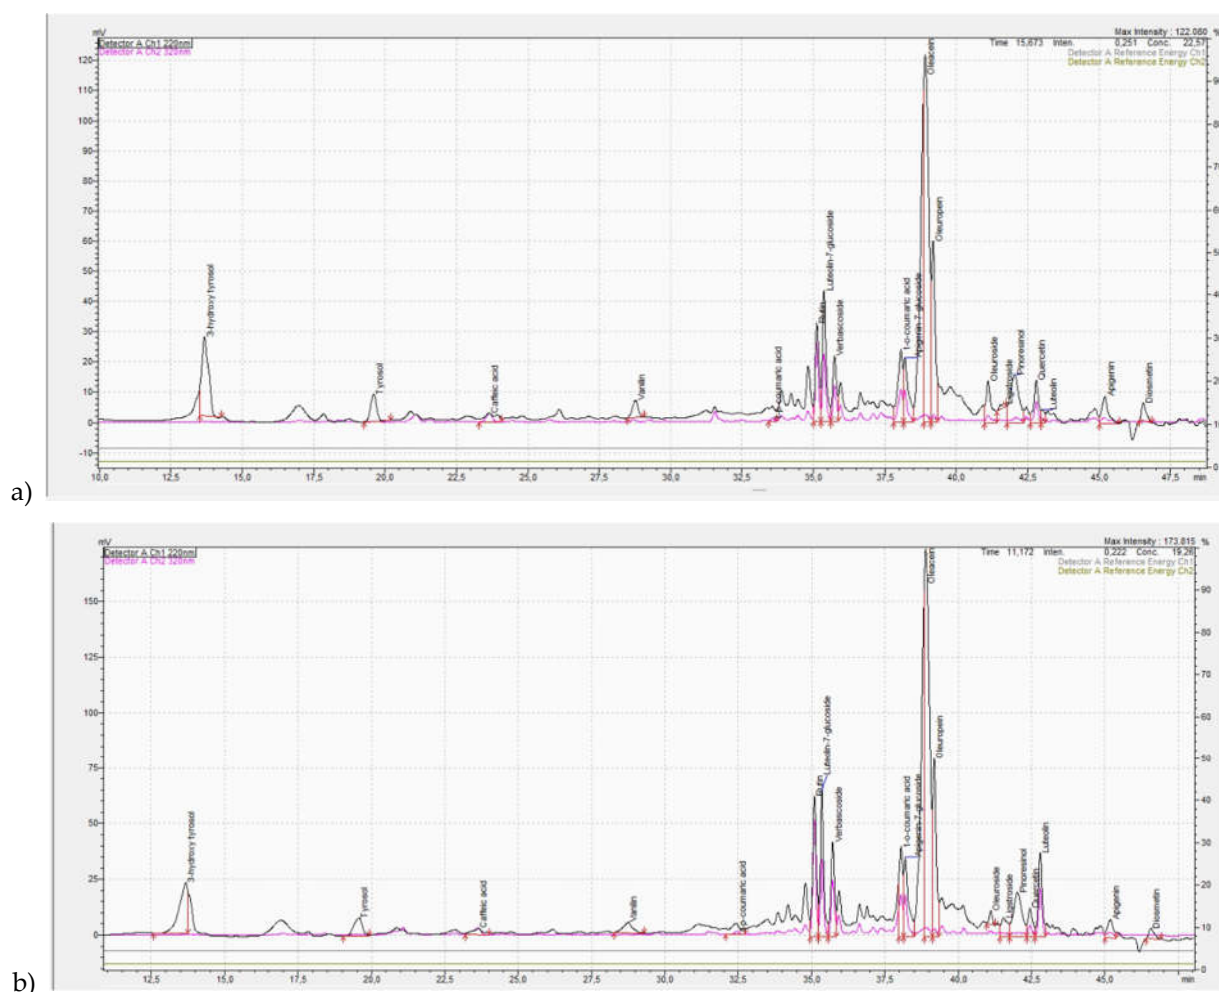

Figure S2: HPLC chromatograms of olive vegetative bud methanol extracts for (a) cv. *Lastovka* (b) cv. *Oblica*, at 220 (black line) and 320 nm (purple line). Identified and quantified phenolic compounds in order of appearance: 3-hydroxytyrosol, tyrosol, caffeic acid, vanillin, *trans-p*-coumaric acid, rutin, verbascoside, luteolin-7-glucoside, *trans-o*-coumaric acid, apigenin-7-glucoside, oleacein, oleuropein, ligstroside, pinoretinol, quercetin, luteolin, apigenin and diosmetin.

*Cv. Lastovka*

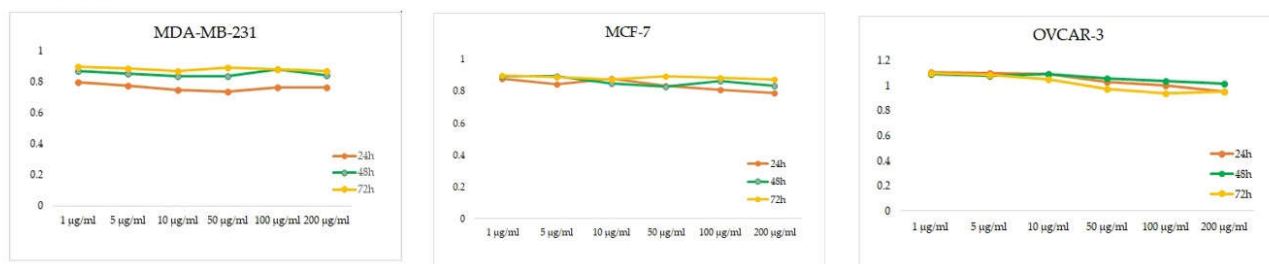

*Cv. Oblica*

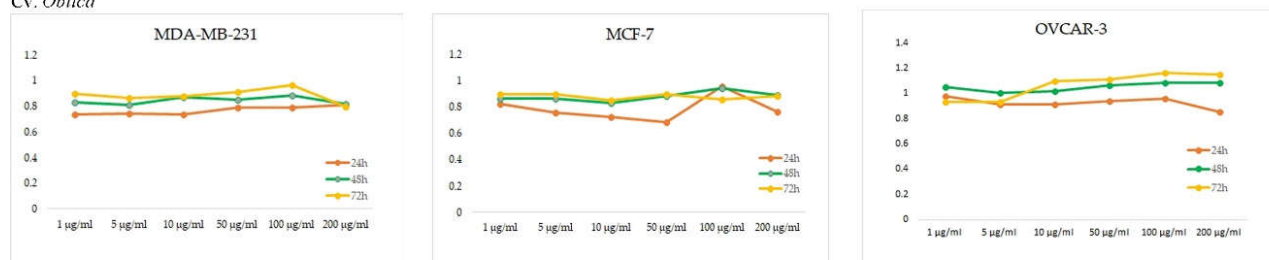

Figure S3: Percentage of metabolically active human breast adenocarcinoma (MDA-MB-231), human breast metastatic adenocarcinoma (MCF-7), and human ovarian carcinoma (OVCAR-3) cell lines after 24, 48 and 72 h of incubation with different concentrations of olive bud essential oils from cvs. *Lastovka* and *Oblica*
